# Supplementary material
Source: Springer Nature journal article supplement (https://www.springermedizin.de/resource/supplementary/12885_2008_1101_MOESM2_ESM.pdf/9471116)

**a**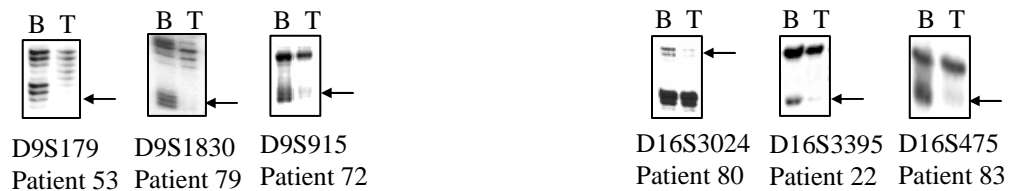

NI ○  
 IN ⊞  
 LOH ●  
 MI ⊕

**b**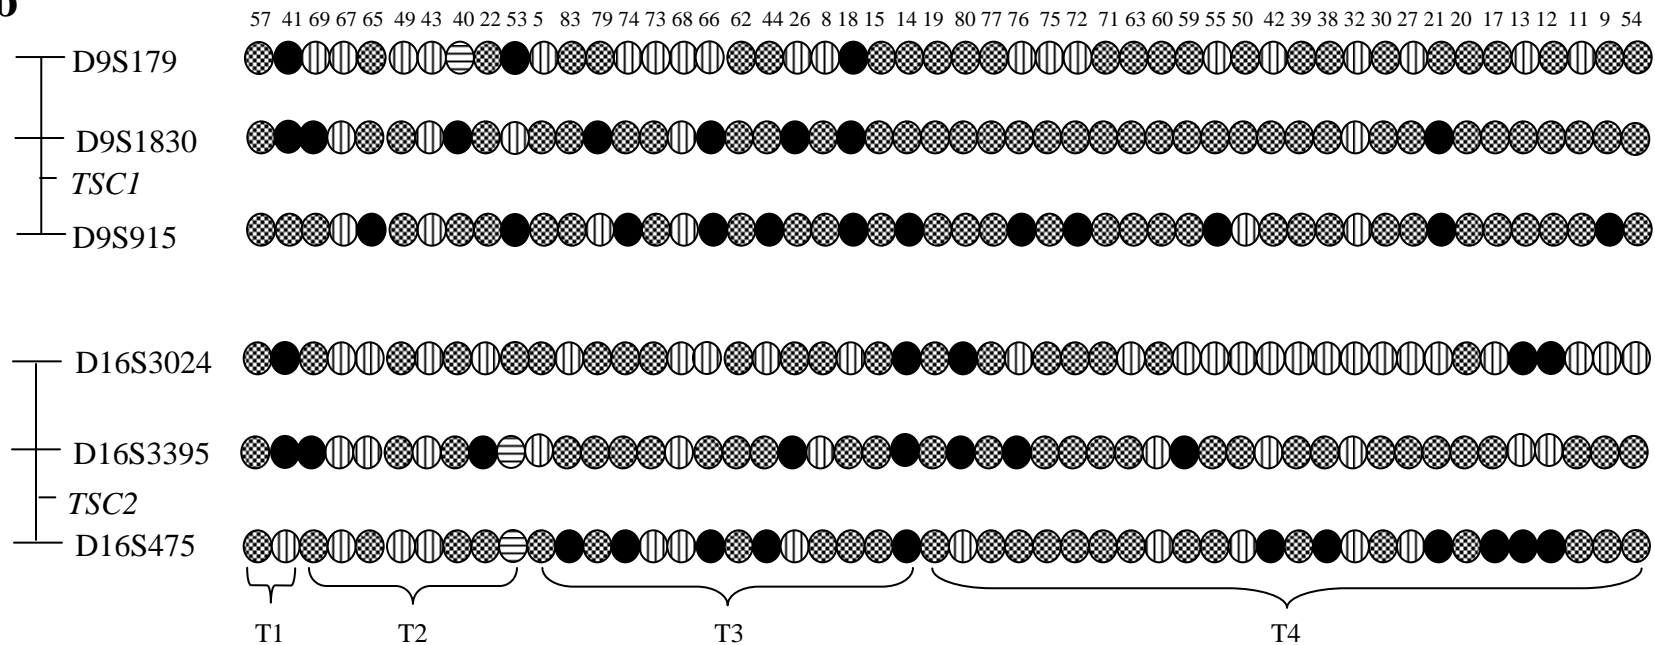

Supplement: MOESM2 [file 9471116]
